# Supplementary material
Source: publisher figshare collection journal article supplement (https://acs.figshare.com/ndownloader/files/4264006)
Supplement: Supplementary file 1 [file 4264006]

## Supporting Information

# Detection of Mercury(II) by Quantum Dot-DNA-Gold Nanoparticle Ensemble Based Nanosensor Via Nanometal Surface Energy Transfer

Ming Li,<sup>†</sup> Qiaoyi Wang,<sup>‡</sup> Xiaodong Shi,<sup>‡</sup> Lawrence A. Hornak,<sup>§</sup> and Nianqiang Wu\*,<sup>†</sup>

<sup>†</sup>Department of Mechanical and Aerospace Engineering, WVNano Initiative, <sup>‡</sup>Eugene Bennett  
Department of Chemistry, <sup>§</sup>Lane Department of Computer Science and Electrical Engineering,  
West Virginia University, Morgantown, WV 26506, USA

\*Corresponding author: Tel: +1-304-293-3326, Fax: +1-304-293-6689, E-mail: [nick.wu@mail.wvu.edu](mailto:nick.wu@mail.wvu.edu)

## DNA loadings of QDs and Au NPs

The loading of ssDNA onto the QDs was determined based on the UV-Vis absorption spectra before and after modification with ssDNA and the absorbance difference at 260 nm.<sup>1</sup> The molar extinction coefficient ( $\epsilon$ ) of QDs is  $2.0 \times 10^5$  L/(mol·cm) according to the literature.<sup>2</sup> In addition, the exact DNA concentration can be determined by the absorbance at 260 nm, according to<sup>3</sup>

$$1 \text{ O.D. (260 nm)} = 50 \text{ ng DNA}/\mu\text{L}$$

Therefore, since the resulting DNA-QD stock solution has a QD concentration of 0.9  $\mu\text{M}$  ( $C = A_{551\text{nm}} / (b \cdot \epsilon)$ ), the average DNA loading can be calculated to be four DNAs per QD.

Similarly, we can obtain the DNA loading per Au NP. 3 nm Au NPs contain 976 Au atom ( $\text{Au}_{976}$ ).<sup>4</sup> The average DNA loading was roughly estimated to be one DNA per Au NP. In the above calculation, we used the molecular weight 3043 g/mol and 2985 g/mol for 5'-HS-CAGTTTGGAC-3' and 5'-HS-GTCCTTTCTG-3', respectively.

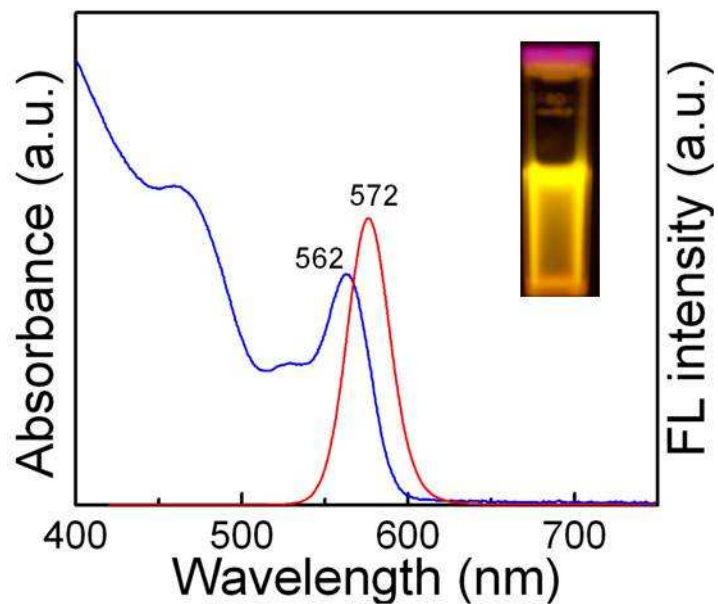

**Figure S1.** UV-Visible absorption and fluorescence emission spectra of the TOPO-capped quantum dots (QDs) in  $\text{CH}_2\text{Cl}_2$ . The TOPO-capped QDs show a fluorescence emission peak at 572 nm and the first absorption peak at 562 nm. The inset is the photo of the TOPO-capped QDs in  $\text{CH}_2\text{Cl}_2$  under 365 nm light.

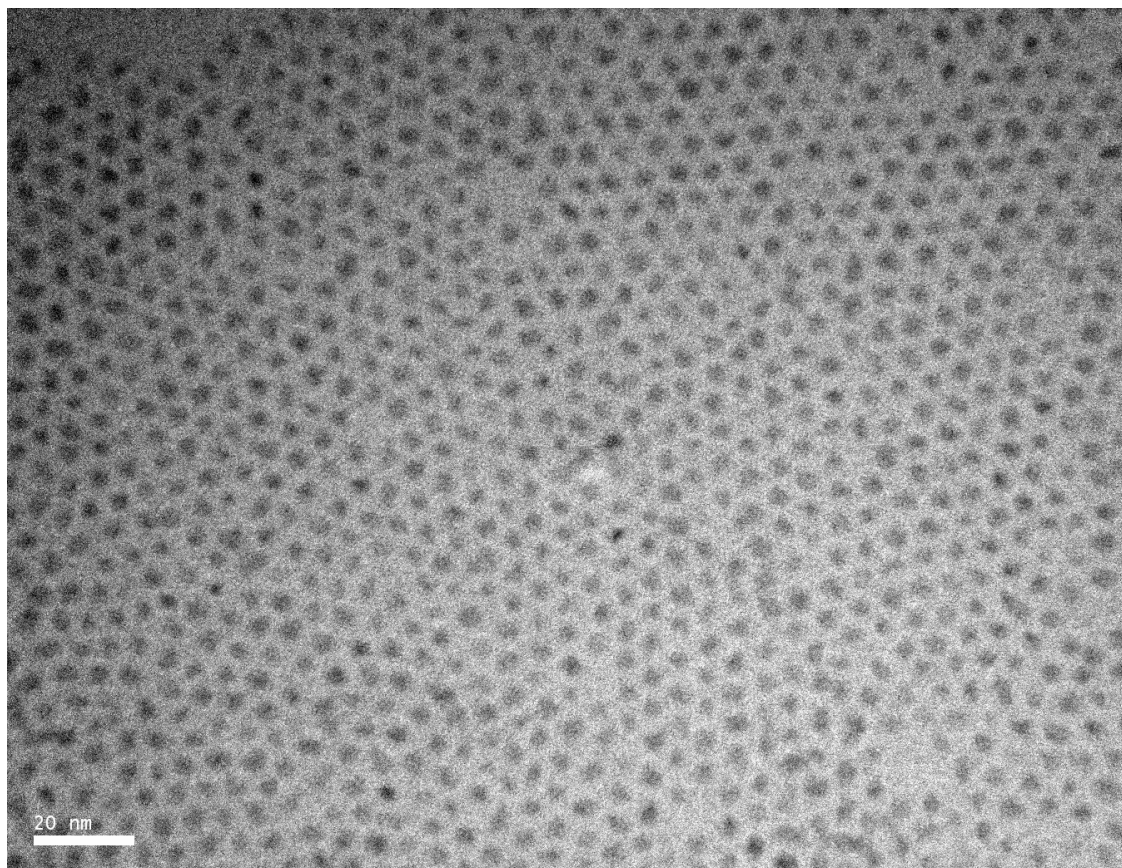

**Figure S2.** TEM image of the TOPO-capped quantum dots (QDs) used for the QD-DNA-Au ensemble based nanosensor, showing the particle size of 3.8 nm and the narrow size distribution.



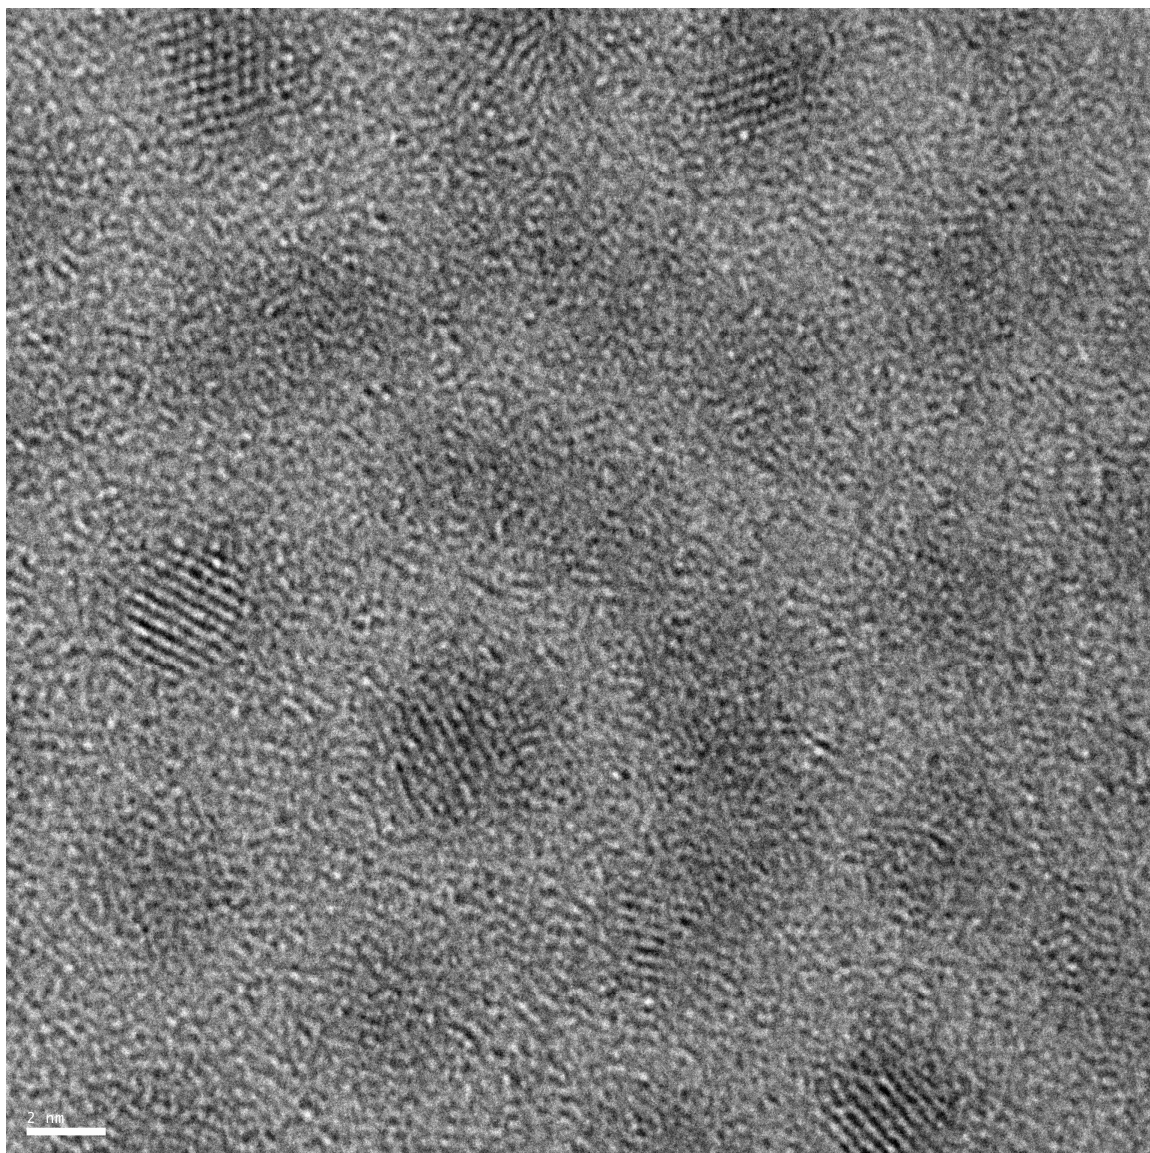

**Figure S3.** HRTEM image of the TOPO-capped quantum dots used for the QD-DNA-Au ensemble based nanosensor (scale bar: 2 nm).

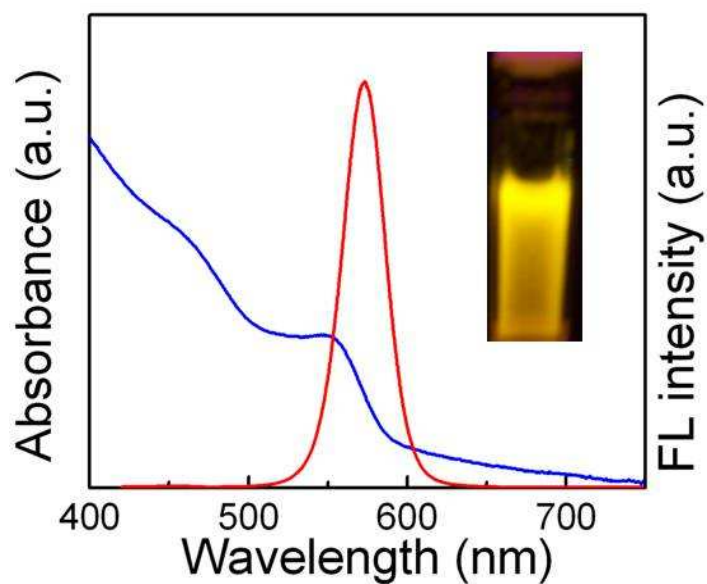

**Figure S4.** UV-Visible absorption and fluorescence emission spectra of DNA-functionalized quantum dots (QDs) in 0.3 M PBS buffer solution. The inset is the photo of the DNA-functionalized QDs in 0.3 M PBS buffer under 365 nm light. The DNA functionalized QDs show a fluorescence emission peak at 572 nm and an absorption peak at 556 nm in 0.3 M PBS solution.

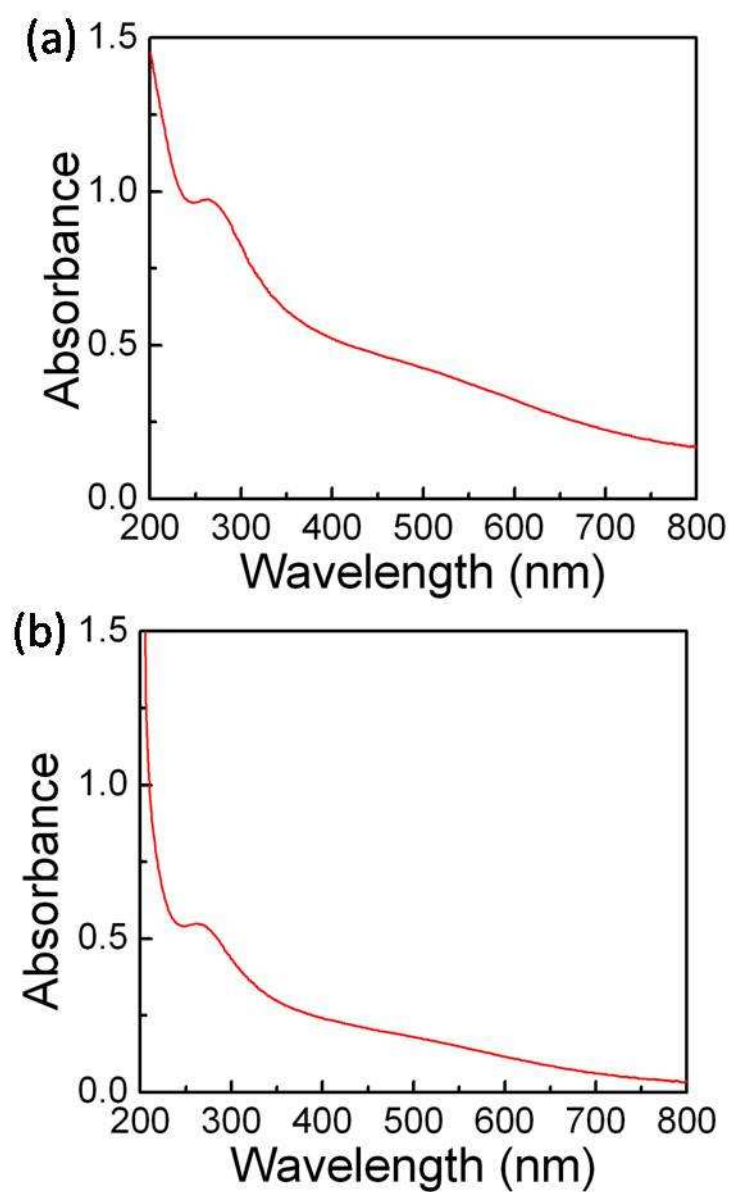

**Figure S5.** UV-Visible absorption spectra of (a) as-made 3 nm Au nanoparticles (NPs), and (b) DNA-functionalized Au NPs in 0.3 M PBS solution. Both the UV-Visible absorption spectra show no surface plasmon resonance absorption band.

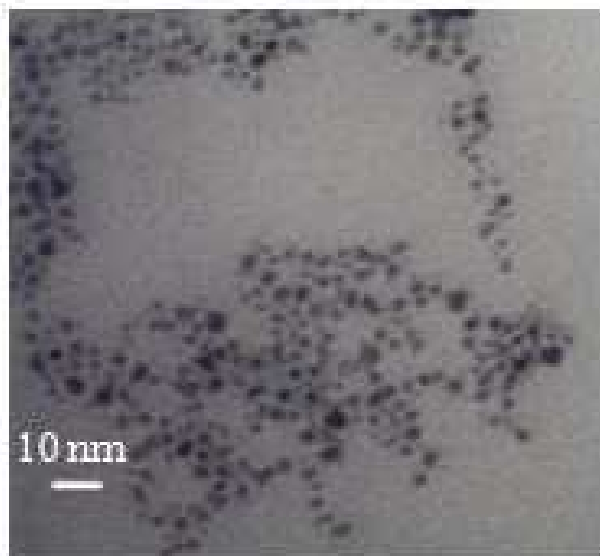

**Figure S6.** TEM image of the as-made Au nanoparticles used for the QD-DNA-Au ensemble based nanosensor

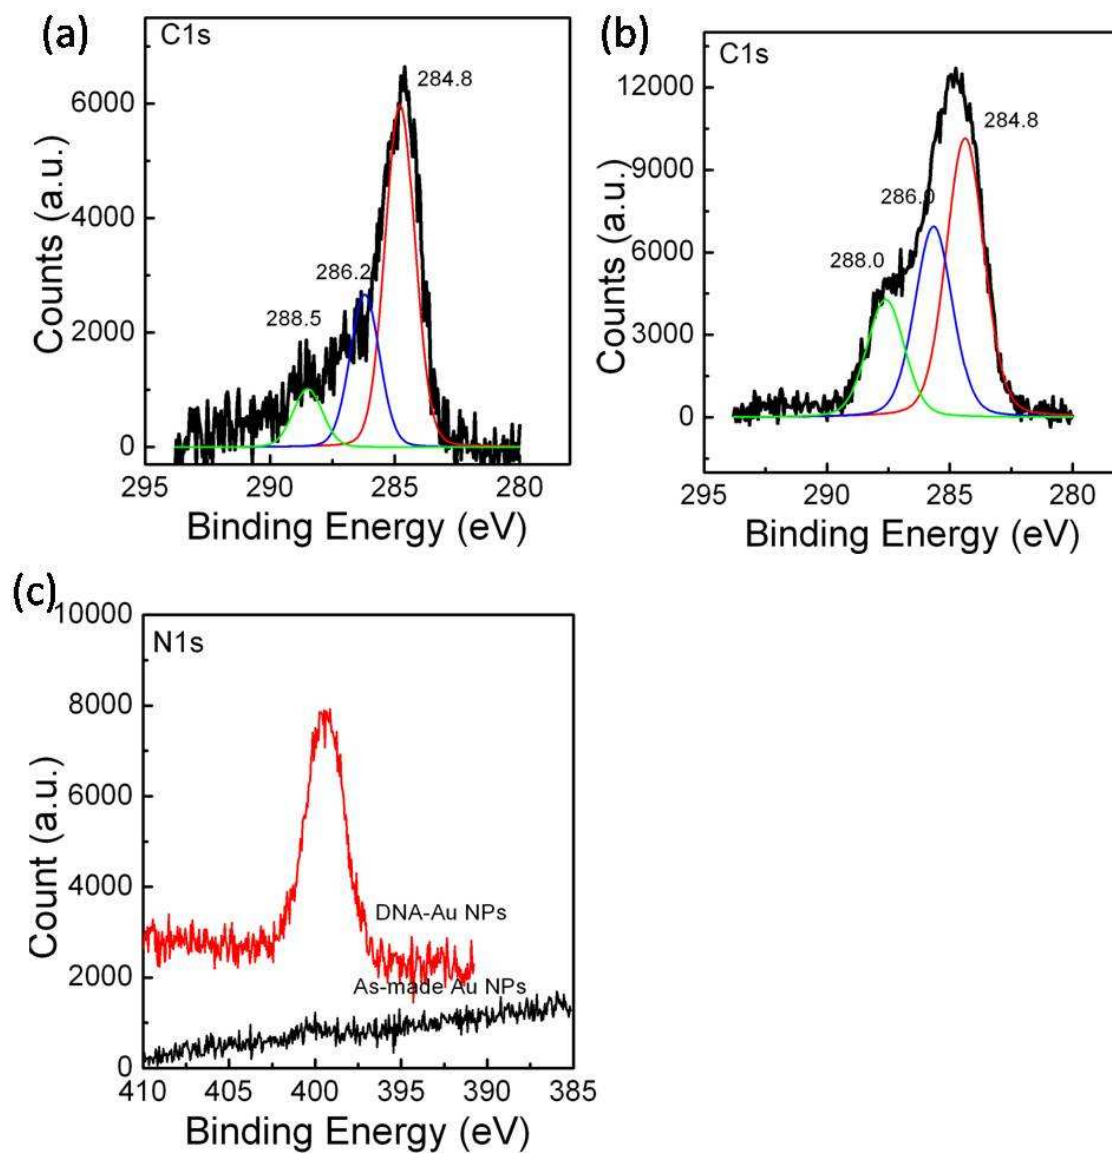

**Figure S7.** XPS spectra: (a) the C 1s core level of the as-made Au nanoparticles. (b) the C 1s core level of the DNA functionalized Au nanoparticles. (c) the N 1s core level of the as-made Au nanoparticles and the DNA-functionalized Au nanoparticles.

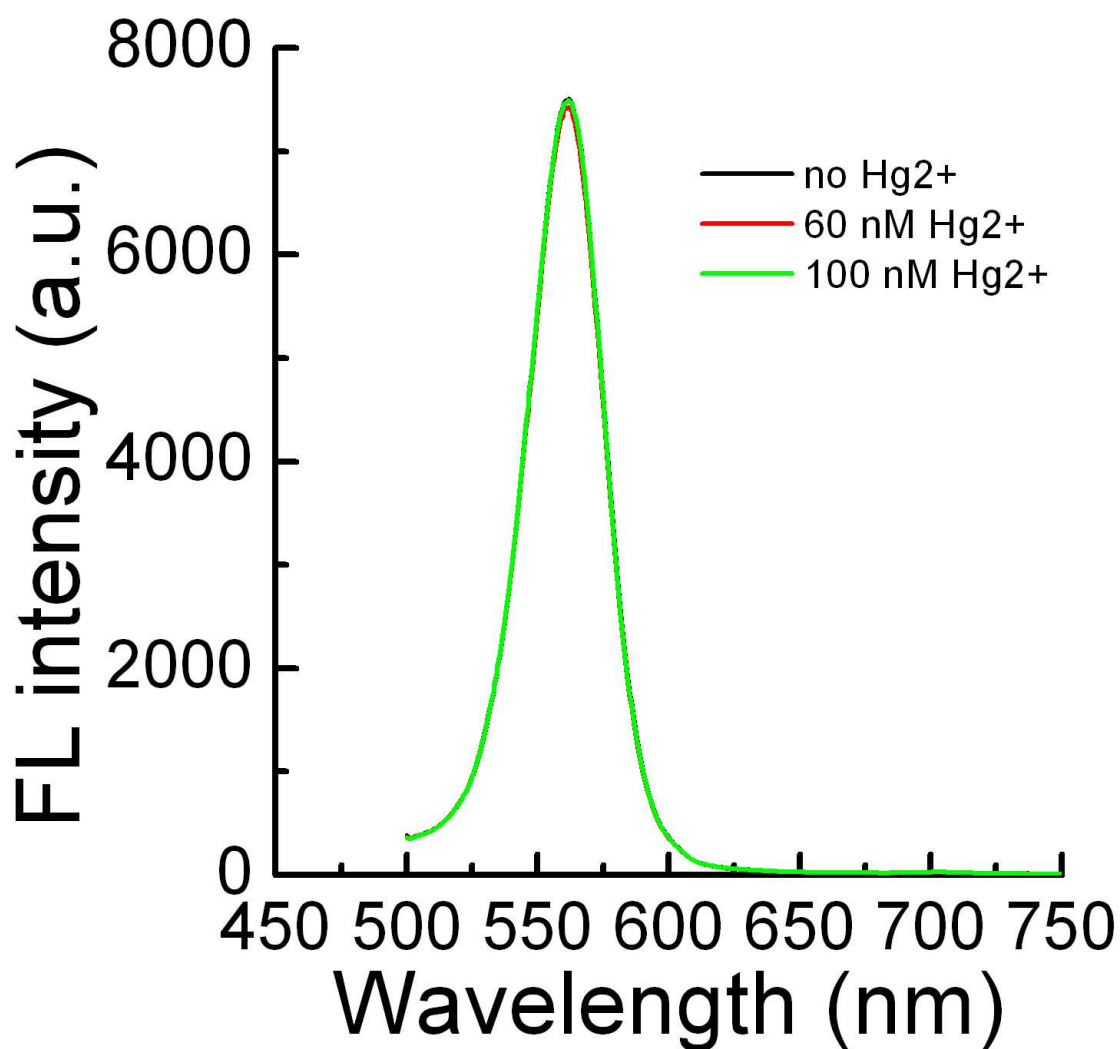

**Figure S8.** Fluorescence spectra of DNA-functionalized quantum dots (QDs) in the absence and presence of 60 nM and 100 nM. The FL intensity shows no observable change after addition 60 nM and 100 nM  $\text{Hg}^{2+}$ , indicating that  $\text{Hg}^{2+}$  makes negligible contribution to quenching of fluorescence from QDs in the present work.

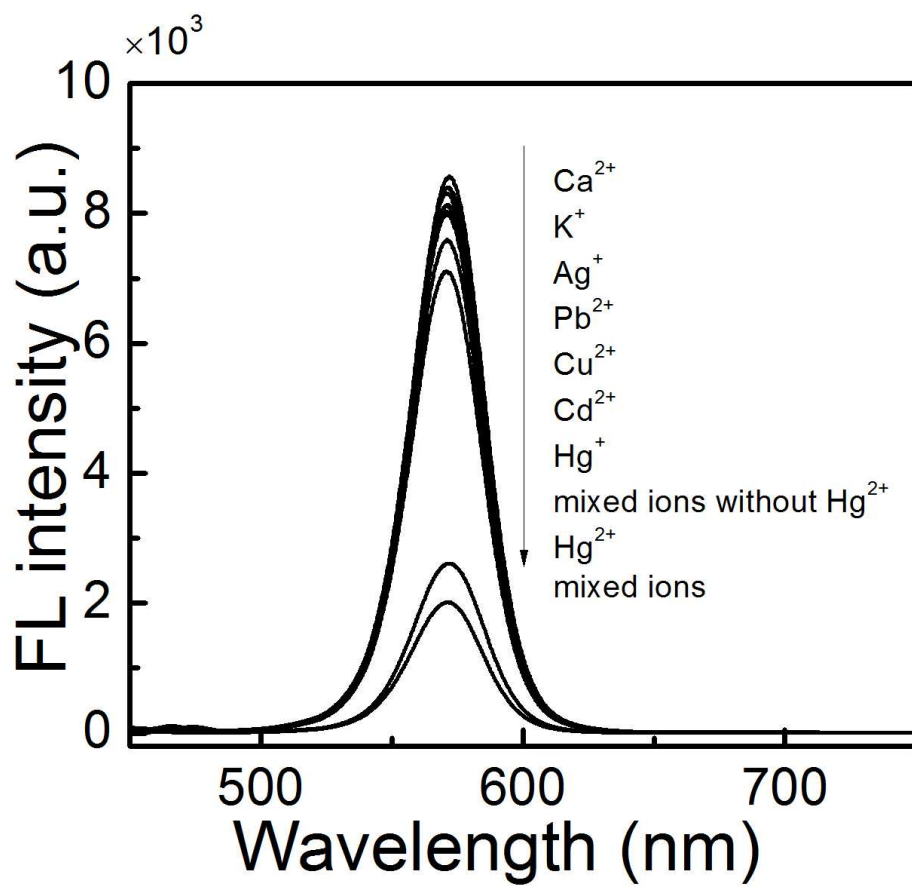

**Figure S9.** Fluorescence spectra of the QD/DNA/Au NP system in 0.3 M PBS buffer solution after addition of various metal ions at the concentration of 100 nM (96 nM QDs, 104 nM Au NPs and 0.1 mM ethylenediamine in 0.3 M PBS).

## References

1. Freeman, R.; Finder, T.; Willner, I. Multiplexed Analysis of  $\text{Hg}^{2+}$  and  $\text{Ag}^+$  Ions by Nucleic Acid Functionalized CdSe/ZnS Quantum Dots and Their Use for Logic Gate Operations. *Angew. Chem. Int. Ed.* **2009**, *48*, 7818–7821.
2. Yu, W. W.; Qu, L.; Guo, W.; Peng, X. Formation and Stability of Size-, Shape-, and Structure-Controlled CdTe Nanocrystals: Ligand Effects on Monomers and Nanocrystals. *Chem. Mater.* **2003**, *15*, 2854-2860.
3. Molecular Techniques and Methods, Construction of Genomic Library, <http://www.molecularinfo.com/MTM/A/A2/A2-3/A2-3-1.html>, (accessed on January 12, 2011).
4. Hostetler, M. J.; Wingate, J. E.; Zhong, C.-J.; Harris, J. E.; Vachet, R. W.; Clark, M. R.; Londono, J. D.; Green, S. J.; Stokes, J. J.; Wignall, G. D.; Glish, G. L.; Porter, Marc D.; Evans, N. D.; Murray, R. W. Alkanethiolate Gold Cluster Molecules with Core Diameters from 1.5 to 5.2 nm: Core and Monolayer Properties as a Function of Core Size. *Langmuir* **1998**, *14*, 17-30.
